# Birdsong Phrase Verification and Classification Using Siamese Neural Networks

Santiago Rentería<sup>\*1</sup>, Edgar E. Vallejo<sup>1</sup>, and Charles E. Taylor<sup>2</sup>

<sup>1</sup>Tecnológico de Monterrey

<sup>2</sup>University of California Los Angeles

March 3, 2021

## Abstract

The process of learning good features to discriminate among numerous and different bird phrases is computationally expensive. Moreover, it might be impossible to achieve acceptable performance in cases where training data is scarce and classes are unbalanced. To address this issue, we propose a few-shot learning task in which an algorithm must make predictions given only a few instances of each class. We compared the performance of different Siamese Neural Networks at metric learning over the set of Cassini’s Vireo syllables. Then, the network features were reused for the few-shot classification task. With this approach we overcame the limitations of data scarcity and class imbalance while achieving state-of-the-art performance.

**Keywords**— Bioacoustics, Machine Learning, Birdsong phrase classification

## 1 Introduction

Current evolutionary studies of bird vocalizations require *automatic unit segmentation and classification* methods capable of generalizing not only across species but also dealing with noisy environments. By extracting patterns from large-scale recordings new hypotheses regarding birdsong structure could be tested while at the same time reduce human bias and increase research reproducibility. Previous work in this area has been done with different species using a wide range of techniques such as Hidden Markov Models (Kaewtip, Taylor, & Alwan, 2016; Koumura & Okanoya, 2016), Support Vector Machines (Arriaga, Kossan, Cody, Vallejo, & Taylor, 2013), Dynamic Time Warping (Tan, Alwan, Kossan, Cody, & Taylor, 2015) and Deep Learning (Koops, van Balen, & Wiering, 2015). Within these lines in this work we focus on *automatic unit classification* by comparing different Siamese Neural Networks, a few-shot machine learning technique capable of discriminating syllable classes from scarce data.

---

\*santiagorenteria25@gmail.com

28 Our main objective is to find a classifier capable of dealing with data sparsity and class imbalance in  
29 *Vireo cassinii* syllable repertoires. These are common issues in birdsong research given limited recordings  
30 and the existence of rare syllables. In the long run, we expect our results to have a significant impact  
31 in ecology and evolutionary biology, where new analysis tools will overcome the limitations of manual  
32 (human) recognition (Kershenbaum et al., 2016). We propose a few-shot machine learning approach to  
33 classify *Vireo cassinii* syllables using a family of siamese neural networks with different encoders, including  
34 convolutional, LSTM, Bidirectional LSTM fully-connected and "encoderless" siamese networks. The latter  
35 is equivalent to  $k$ -nearest neighbor classifier with euclidean metric.

36 The main contribution to biology is providing a tool to increase our knowledge about sophisticated  
37 signaling strategies and syntactic structures in non-human species as birds. By the other side, the model  
38 is computationally interesting since few-shot classification approaches constrain the algorithm to learn to  
39 discriminate among instances by only observing a few samples from each class. This is similar to the kind  
40 of learning observed in children, which develop sophisticated rules about new word categories from very few  
41 or even no examples at all (Yip & Sussman, 1997; Furbee, 1992). In contrast, most Deep Learning models  
42 rely on large data sets to achieve acceptable performance. As far as we know, few-shot deep learning has  
43 not been applied to birdsong, although in principle the general approach can be replicated for almost any  
44 modality or domain.

## 45 1.1 Birdsong structure

46 Acoustic sequences are ubiquitous, from bird songs to human speech and music. More often than not  
47 they convey meaning, and have an important role in evolution as individuals can take advantage of the  
48 information contained in them (Kershenbaum et al., 2016). But when a bird sings how do we know whether  
49 communication has occurred? It is generally held by biologists that if the signal modifies the behavior of  
50 the receiving animal, then we can infer that communication has taken place. Similarly, we might say an  
51 acoustic sequence carries information when it has the potential to reduce uncertainty on the part of the  
52 receiver.

53 Bird acoustic sequences, also known as vocalizations, can be divided into *songs* and *calls*. In general  
54 songs tend to be long, complex vocalizations mostly produced by males during the breeding season for  
55 maintenance of territories and mate attraction. To these features there are innumerable exceptions covered  
56 by (Kershenbaum et al., 2016). By the other side, calls tend to be shorter, simpler in structure and produced  
57 by both sexes throughout the year. They are less spontaneous than songs and are usually related to specific  
58 functions such as flight, threat and alarm. One of the great questions of ornithology is why *Passerines*  
59 have evolved such complex songs and a special neural pathway to learn them. A question that can be  
60 tackled through algorithmic segmentation and classification methods (Catchpole & Slater, 2008).

61 *Songs* are subdivided in *phrases*, *syllables* and *elements*. Each *phrase* consists of a series of units (*syl-*  
62 *lables*) which occur together in a particular pattern. Similarly, *syllables* when complex, can be constructed  
63 from several of the smallest building blocks of all, known as *elements*. Regarding *songs*, each bird can have  
64 more than one version, making up a *repertoire* of song types. It is important to mention in the literature  
65 *phrases* and *syllables* are used interchangeably but ultimately they refer to medium-sized fragments of bird  
66 vocalizations.

## 67 1.2 Birdsong analysis techniques

68 Accurate analysis of bird vocalizations depends on appropriately characterizing their constituent units.  
69 Nevertheless, there is no single definition of unit, these vary widely across researchers. This is by no means  
70 whimsical as the characterization of units depends on the question being addressed.

71 Often the details of acoustic production and perception are hidden from the researcher, in consequence  
72 definition of acoustic units has to be carried out on the basis of observed acoustic properties. The first step  
73 is defining what possible functions a sound has, then formulating appropriate hypotheses after a period  
74 of observation and field study, which relates the singing bird to its habitat, general life and evolutionary  
75 history. Having observed and listened to birds in their habitat, the next step is to make audio recordings  
76 of their song and analyze them (Catchpole & Slater, 2008). Most analytic methods for unit classification  
77 assume they can be divided into discrete, distinct categories (Clark, Marler, & Beeman, 1987). According  
78 to this hypothesis, Kershenbaum et al. (2016) describe four main approaches to classify units by their  
79 acoustic properties:

### 80 1. Manual classification

81 Units are "hand-scored" by humans searching for consistent patterns in spectrograms or by listening  
82 sound recordings without the aid of a spectrogram. Even if humans are good at pattern recognition,  
83 manual segmentation and classification is time consuming and prevents taking full advantage of  
84 large acoustic data sets generated by automated recorders. Similarly, this difficulty hinders research  
85 reproducibility as sample sizes studied tend to be too small to draw firm conclusions (Kershenbaum,  
86 2014). Furthermore, manual classification can be prone to subjective error, and inter-observer re-  
87 liability should be used (and reported) as a measure of the robustness of the manual assessment  
88 (Kershenbaum et al., 2016).

### 89 2. Classification of manually extracted metrics

90 An alternative to manual segmentation is using feature extraction, for example: duration, pulse  
91 repetition rate, spectral centroid, Mel Frequency Cepstral Coefficient (MFCC) among others. These  
92 features are then used in classification algorithms and mathematical techniques such as principal com-  
93 ponent analysis (PCA), discriminant function analysis or classification and regression trees (CART).  
94 In this category we can find semi-automatic techniques where features are extracted by standard  
95 algorithms and then verified by human analysts (Kershenbaum et al., 2016).

### 96 3. Fully automatic metric extraction and segmentation

97 Automatic segmentation or recognition of acoustic units is not prone to inter-observer variability of  
98 manual classification. However, current implementations are: not generalizable to all species (Pearre,  
99 Perkins, Markowitz, & Gardner, 2017), very sensitive to hyperparameters (Ranjard & Ross, 2008),  
100 require pre-determined syllable classes and boundaries (Koumura & Okanoya, 2016) or struggle at  
101 recognizing subtle features that can be detected both by humans and birds (i.e. high false positives  
102 rate or low accuracy in test sets) (Fukuzawa, Marsland, Pawley, & Gilman, 2017; Koops et al., 2015).  
103 Interestingly, manual classification has been shown to out-perform automated systems in cases where  
104 the meaning of acoustic signals is known a priori, possibly because the acoustic features used by  
105 fully automated systems may not reflect the cues used by the focal species (Kershenbaum et al.,  
106 2016). Although, there is motivation in developing fully automated segmentation and classification  
107 algorithms given they allow large scale analysis of birdsong recordings.

108 The definition of a unit for a particular species depends on the question being addressed and is depen-  
109 dent on a large number of factors. In particular, availability of behavioral information, such as responses  
110 of individuals to playback experiments and morphological information. Kershenbaum et al. (2016) suggest  
111 the following protocol to define acoustic units:

- 112 1. Determine what is known about the production mechanism of the signalling individual.
- 113 2. Determine what is known about the perception abilities of the receiving individual. Perceptual  
114 limitations may substantially alter the structure of production units.
- 115 3. Choose a classification method, such as manual, semi-automatic, or fully automatic. Some unit  
116 types lend themselves more readily to certain classification techniques than others.

117 Various algorithmic approaches to birdsong recognition have been made in the last years. For example,  
118 Potamitis used Deep learning for detecting bird vocalisations (Potamitis, Ntalampiras, Jahn, & Riede,  
119 2014). Ranjard and Ross achieved unsupervised bird song syllable classification using evolving neural  
120 networks (Ranjard & Ross, 2008). Modern fully automatic techniques rely on Hidden Markov Models and  
121 Convolutional Neural Networks trained on manually annotated data (Koumura & Okanoya, 2016).

## 122 2 Materials & Methods

123 We propose a few-shot machine learning approach to classify *Vireo cassinii* syllables using a family of  
124 siamese neural networks with different encoders, including convolutional, LSTM, Bidirectional LSTM fully-  
125 connected and "encoderless" siamese networks. The latter is equivalent to  $k$ -nearest neighbor classifier with  
126 euclidean metric.

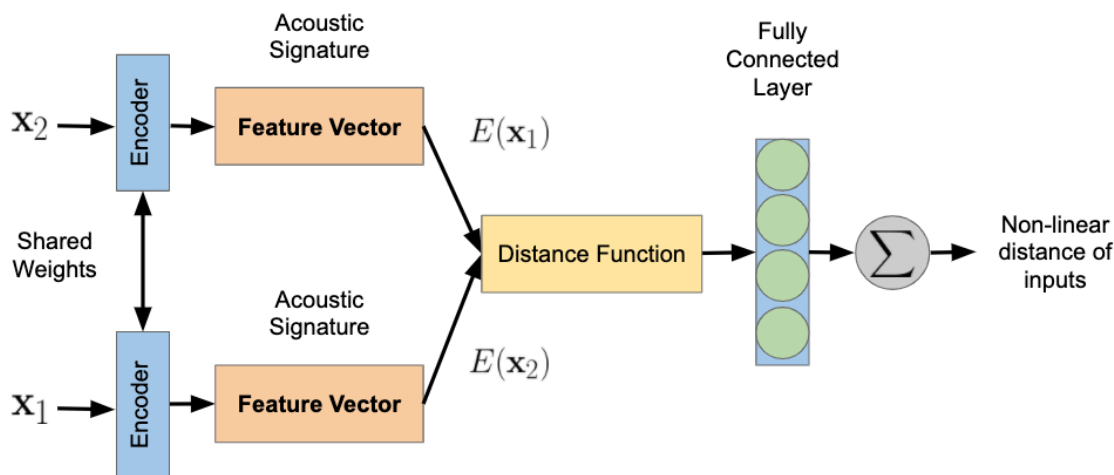

Figure 1: Siamese Network Model Overview

127 We studied the generalization capabilities of this family of siamese models under 1,3,5 and 7 examples.  
128 In order to do so, each model was trained to carry out a verification task, which then generalized to few-shot  
129 classification: First, it learned to assign a low distance score to pairs of syllables of *Vireo cassinii* belonging  
130 to the same class. Then, we used the learned similarity function to evaluate syllables in a pairwise manner  
131 against a representative instance of each class (i.e. average of training set). The pairing with the lowest  
132 distance score was awarded the highest probability for the classification task. Figure 1 depicts the Siamese  
133 Network model in general.

## 134 2.1 Species: *Vireo cassinii*

135 This species, also known as Cassin’s Vireo (abbreviated as “CAVI” in singular, or “CAVIs” in plural in  
136 this paper) belongs to the order of *Passeriformes* and to the *Vireonidae* family. It is commonly found in  
137 many coniferous and mixed-forest bird communities in far western North America. Only the males of this  
138 species give full songs, and their songs have been described as a jerky series of blurry phrases, separated  
139 by pauses of  $\geq 1$  second. Each phrase is made up of 2 to 4 notes (syllables), with song often alternating  
140 between ascending and descending phrases. The song is repeated tirelessly, particularly when the singing  
141 male is unpaired (Goguen & Curson, 2002).

142 Songs from two males on two different territories in a conifer-oak forest in California were recorded  
143 at approximately 800 m elevation ( $38^{\circ}29'04''N$ ), ( $120^{\circ}38'04''W$ ), near the city of Volcano in California  
144 (Amador County), USA. The data collection was done between April and June 2010. Manual inspection  
145 was done using Praat software to identify the phrase class, and mark the start and end times of each  
146 song element. The recordings and annotations for this 2010 collection are freely available online at Bird-  
147 DB. This was the same data set used by Tan, Kossan, Cody, Taylor, and Alwan (2013) for bird phrase  
148 verification and classification with a sparse representation-based classifier. In this work it will be referred  
149 as *Tan2013* data set.

## 150 2.2 Data & Tools

151 In *Tan2013* dataset there are 1116 tokens in total grouped in 64 classes, with a range of 1 to 73 tokens  
152 each (See Figure 7). The more frequently observed 32 phrase classes have at least  $n = 12$  tokens. These  
153 conform the *filtered set*, which amounts to 1033 tokens. Phrases depicted in Figure 8, were used as a  
154 *support set* for siamese neural network classification. Since our main interest was to test siamese neural  
155 networks performance in a  $k$ -shot scenario with  $k = [1, 3, 5, 7]$ ,  $n - k$  tokens from each of the 32 classes  
156 were removed at random from the *filtered set* (See Figure 5) to make the *test set*. The remainder conforms  
157 the *training set*. Infrequent classes amount to 83 tokens, and are one of the main reasons few-shot learning  
158 approaches are relevant to birdsong research.

159 Regarding phrase duration, the longest instance is of class ‘at’ with 27525 audio samples, and the  
160 shortest is of class ‘bm’ with audio 3794 samples. With a sample rate of 22.5 Khz they are respectively  
161 1.24 s and 0.172 s long. In the *filtered set* the shortest is the same but the longest is of class ‘ac’ with a  
162 duration of 1.06 s and 21352 audio samples (See Figure 6).

## 163 2.3 Database: Bird-DB

164 Projects on the acoustic monitoring of animals in natural habitats generally face the problem of manag-  
165 ing extensive amounts of data produced for experimentation. While there are many publicly accessible  
166 databases for birdsong recordings, such as Xenocanto (Planqué & Vellinga, 2005) and Macaulay Library  
167 from Cornell University, most of them lack annotated song sequences.

168 Bird-DB provides an interface and annotated database for studying the syntax of bird song. Users  
169 are capable of selecting attributes relating to several general aspects of the stored recordings, for instance:  
170 recording hardware, location and environment. Queries can be narrowed down to specific species and  
171 individuals. The database returns a list of records meeting those criteria, with links to the appropriate  
172 audio and annotation files in *TextGrid* format (Arriaga, Cody, Vallejo, & Taylor, 2015).

## 173 2.4 Pre-processing

174 Phonological analysis of animal vocalizations requires specialized software providing visualization, anno-  
175 tation and measurement tools for analyzing audio recordings of any length. *Raven Pro* (Bioacoustics  
176 Research Program & Program, 2014), a software maintained by The Cornell Lab of Ornithology, is widely  
177 used in bioacoustic research. Nevertheless, since the recordings from Bird-DB were annotated in *Praat*  
178 software (Boersma & Weenink, 2011), we stick to this option. Both have similar specifications, despite  
179 *Praat* was designed for human phonetics analysis, whereas *Raven Pro* emerged from the broader field of  
180 bioacoustics.

181 Birdsong phrase annotations in Praat are processed and stored using the *Textgrid* format. Audio and  
182 annotation files are stored separately. A *TextGrid* object consists of a number of tiers of two kinds:

- 183 1. **Interval tier:** A connected sequence of labelled intervals, with boundaries in between.
- 184 2. **Point tier:** A point tier is a sequence of labelled points.

185 Through *Praat*'s interface users can store and label sequences of intervals, which later are employed  
186 to segment recordings. It is important to note birdsong phrase identifiers, like *bm* or *bp*, have no intrinsic  
187 meaning, they only provide a notation system to label classes of sounds.

188 Recordings were annotated by humans and segmented using a Python library (*praatIO*) by taking as  
189 an input the corresponding pairs of (*Textgrid*, audio file). The output of this procedure are a set of labeled  
190 audio (.wav) segments at a sample rate of 22,050 Hz and 32 bit resolution each. Since the meaningful  
191 information of *Tan2013* CAVI database is within the range of 1 kHz and 8 kHz, the rest of the frequencies  
192 can be safely removed using a bandpass filter. For this reason we applied a Butterworth Bandpass filter  
193 with 1 kHz and 8 kHz cut-off frequencies.

194 The sampling rate was first reduced to 20 kHz because energies of interest are below 10 kHz. Since  
195 every phrase instance has a variable duration, to generate a feature vector of the same dimension for each  
196 token, a file-duration-dependent frame shift was used to compute its spectrogram. The frame-shift was  
197 calculated by Tan (Tan, Kaewtip, Cody, Taylor, & Alwan, 2012) as follows for  $t = [0, N - 1]$ , with  $N$  as  
198 the number of frames per token:

$$S_t = \text{round}\left(\frac{D - W}{N - 1}t\right)$$

199  $D$  and  $W$  denote respectively file duration and frame length in number of samples, whereas the starting  
200 sample index for frame  $t$  is denoted by  $S_t$ . We used the parameters suggested by Tan (Tan et al., 2012),  
201 64 frames per token and a frame length  $W$  of 20 ms, which amounts to 400 samples at a 20 kHz sampling  
202 frequency.

203 A 512-point Fast Fourier Transform is computed at each frame, and values are converted to decibels  
204 (dBFS) units. Given most of the bird phrase energy content falls within 1 and 8 kHz, only frequency bins  
205 corresponding to this range are retained. Finally, the sequence of spectrogram vectors is normalized per  
206 phrase.

## 207 2.5 Syllable Classification Models

208 We evaluated and implemented in Keras framework, four siamese networks with the following feature  
209 extractors: *convolutional (CNN)*, *fully-connected (FCN)*, *LSTM*, *bidirectional-LSTM* networks for  $k =$   
210  $[1, 3, 5, 7]$ , these values were chosen for benchmarking purposes, as they were the ones reported by Tan et  
211 al. (2012). In addition to *Tan2013* nearest subspace approach, we compare the performance of siamese  
212  $k$ -shot learners to a *zero neural network (Zero)*. This is a siamese neural network with no feature extractor  
213 mimicking the behavior of a  $k$ -nearest neighbor classifier with euclidean metric. As previously mentioned,  
214 the remaining  $n - k$  examples, where  $n$  is the number of items in each class, were used as a *test set*.

215 These five models were chosen for they are representative of the most used neural network architectures  
216 (Goodfellow et al., 2016). Furthermore, they embody different computational principles regarding temporal  
217 processing, parameter sharing, sparse interaction and connectivity. We summarize neural network details  
218 in Table 7 in the Appendix.

219 Given the stochastic nature of the sampling and optimization procedures in siamese neural networks,  
220 we ran each model 30 times and provide a 95% confidence interval for each value of  $k$ . In this way we can  
221 assess model sensitivity to training set size under normality assumptions. Hypothesis testing results are  
222 reported in the following chapter. The *support set* was generated by averaging per class the spectrograms  
223 in *training set*. Thus, the shape of input data is an array of shape (64, 128). The *support set* is used during  
224 classification as a set of exemplars to which distances are measured.

225 Even if it is desirable, we did not carry out cross-validation nor hyperparameter optimization due the  
226 high computational cost involved in training multiple deep neural networks. Experiments were performed  
227 on a laptop with a NVIDIA GeForce GTX 1050 GPU.

228 All pairs used to train siamese networks were sampled at random from the pre-processed *filtered set*,  
229 which amounts to 1033 instances across 32 classes. During each training round we sampled a total of 64000  
230 pairs of instances, 2000 per class consisting of half same and half contrasting pairs. The test set contained  
231 6400 pairs sampled at random, 200 per class. Finally, the output of siamese networks is interpreted as a  
232 metric between the input spectrograms of shape (64, 128). With this metric we carry out classification by  
233 assigning to each query the class of the closest instance in the *support set*.

## 234 3 Results

235 Does increasing the value of  $k$  (shots) improve the performance of few-shot models? To what extent  
236 computationally expensive models, such as Siamese Bidirectional LSTM benefit from having more training  
237 data (larger values of  $k$ )? To answer these questions we analyzed the average accuracy of different siamese  
238 models at four values of  $k$ . Average accuracy was computed over the most frequent 32 phrase classes.  
239 Significance across performance for each model was evaluated using pairwise z-tests for the difference  
240 between average classification test accuracy with different values of  $k$ .

241 Tables 1 to 5 provide data on the average classification accuracy of each model at the test set for  
242 different values of  $k$ . Since training sets were small ( $k = 1, 3, 5, 7$ ), and models' training phase relied on  
243 stochastic optimization techniques, we trained each model 30 times with different training set samples  
244 and random seeds. This decision was taken on the grounds of computational resources availability (i.e.  
245 experiments were performed on a mid-end personal computer) and the central limit theorem. For more  
246 details on the implementation please contact the author to obtain the scripts.



247 Fully-connected siamese network (FCN) did not benefit significantly from increasing values of  $k$ . FCN  
 248 shows accuracy distributions with high variance, indicating high sensitivity to the selection of training  
 249 instances per class. Highest classification accuracy obtained by this model was 12.81% with 7 shots.  
 250 Convolutional siamese network greatly improved with respect to FCN, but p-values show diminishing  
 251 returns after  $k = 3$ . Highest classification accuracy was 77.03% with 7 shots. LSTM siamese network  
 252 had a similar performance ( $\sim 73\%$ ) to its convolutional counterpart for  $k = 3$ , but overcame it at  $k =$   
 253  $5, 7$ , indicating greater learning capacity of LSTM siamese network. Highest accuracy for LSTM siamese  
 254 network was 82.03% with 5 shots. Bidirectional LSTM siamese network beat all of the previous models  
 255 with a mean accuracy of 85.14% using 3 shots. Highest accuracy was 91.31% with 7 shots. Finally, the  
 256 Zero neural network beat all of the previous models excepting bidirectional LSTM with a mean accuracy  
 257 of 83.17% using 3 shots. Highest accuracy of the Zero neural network was 90.10% with 7 shots, 1.21%  
 258 below the bidirectional siamese network highest accuracy.

259 LSTM mean accuracy improves less significantly as  $k$  increases, as opposed to the bidirectional version.  
 260 We can confirm a similar situation for the convolutional siamese network. Additionally, accuracy figures  
 261 from the Appendix show higher overfitting for the convolutional model compared to LSTM and Bi-LSTM  
 262 models for  $k = 7$ , as the gap between test and training conditions is larger. This might be explained by  
 263 the fact LSTM models account for the sequential structure of spectrograms. We are faced with a low  
 264 complexity model (*Zero Network*) performing as good as our most complex one (bidirectional LSTM). We  
 265 will try to explain this in the Discussion section alluding to the *manifold hypothesis* and the structure of  
 266 data after applying dimensionality reduction techniques.

|               | Lower limit | Mean   | Upper limit |
|---------------|-------------|--------|-------------|
| <i>1-shot</i> | 0.0797      | 0.0887 | 0.0976      |
| <i>3-shot</i> | 0.0980      | 0.1133 | 0.1286      |
| <i>5-shot</i> | 0.1202      | 0.1381 | 0.1561      |
| <i>7-shot</i> | 0.1085      | 0.1281 | 0.1281      |

Table 1: 95 % confidence intervals for siamese FCN test classification accuracy

|               | Lower limit | Mean   | Upper limit |
|---------------|-------------|--------|-------------|
| <i>1-shot</i> | 0.5140      | 0.5396 | 0.5652      |
| <i>3-shot</i> | 0.7113      | 0.7324 | 0.7536      |
| <i>5-shot</i> | 0.7382      | 0.7570 | 0.7759      |
| <i>7-shot</i> | 0.7522      | 0.7703 | 0.7884      |

Table 2: 95 % confidence intervals for siamese CNN test classification accuracy

|               | Lower limit | Mean   | Upper limit |
|---------------|-------------|--------|-------------|
| <i>1-shot</i> | 0.3864      | 0.4123 | 0.4382      |
| <i>3-shot</i> | 0.6886      | 0.7328 | 0.7769      |
| <i>5-shot</i> | 0.7834      | 0.8203 | 0.8572      |
| <i>7-shot</i> | 0.7745      | 0.8149 | 0.8554      |

Table 3: 95 % confidence intervals for siamese LSTM test classification accuracy



|               | Lower limit | Mean   | Upper limit |
|---------------|-------------|--------|-------------|
| <i>1-shot</i> | 0.4710      | 0.4996 | 0.5282      |
| <i>3-shot</i> | 0.8414      | 0.8514 | 0.8613      |
| <i>5-shot</i> | 0.8930      | 0.9024 | 0.9118      |
| <i>7-shot</i> | 0.9073      | 0.9131 | 0.9189      |

Table 4: 95 % confidence intervals for siamese bidirectional LSTM test classification accuracy

|               | Lower limit | Mean   | Upper limit |
|---------------|-------------|--------|-------------|
| <i>1-shot</i> | 0.6266      | 0.6463 | 0.6661      |
| <i>3-shot</i> | 0.8233      | 0.8317 | 0.8402      |
| <i>5-shot</i> | 0.8762      | 0.8812 | 0.8861      |
| <i>7-shot</i> | 0.8970      | 0.9010 | 0.9050      |

Table 5: 95 % confidence intervals for siamese Zero neural network test classification accuracy

## 267 4 Data Visualization

268 Figure 2 shows the behavior of the same data after applying Principal Component Analysis (PCA), a linear  
269 dimensionality reduction technique. We projected the *filtered set* on the first two principal components,  
270 those with the greatest accumulated variance.

271 Figure 3 shows the behavior of the full dataset (i. e. *filtered set*) after applying t-Distributed Stochastic  
272 Neighbor Embedding (t-SNE), a dimensionality reduction technique minimizing the Kullback-Leibler  
273 divergence between the joint probabilities of the low-dimensional embedding and the high-dimensional  
274 data (Van Der Maaten & Hinton, 2008). The parameters we used were Perplexity: 25; Learning rate: 200;  
275 Metric: Euclidean; Dimension: 2.

276 Figure 4 shows t-SNE projected data along with the centroids computed from an arbitrarily selected  
277 support set with  $k = 7$ . Centroids might be interpreted as class prototypes around which most instances  
278 cluster. In all cases, before applying dimensionality reduction, spectrograms were flattened to obtain  
279 vectors of shape  $1 \times 8192$ . Then, these vectors were projected on a 2D plane.

## 280 5 Discussion

281 The closest study to ours, by Tan et al. (2013), measured the performance of a sparse representation (SR)  
282 classifier for bird phrase verification and classification in the same dataset we used (referred as *Tan2013*).  
283 They found that when evaluated against nearest subspace (NS) and support vector machine (SVM) clas-  
284 sifiers, the SR classifier had the highest test classification accuracy after dimensionality reduction with  
285 PCA: 89.6% using 7 shots. See Table 6.

286 In our study the Zero siamese network reached a similar test classification accuracy with 7 shots  
287 (90.10%), while the bidirectional LSTM reached it with 5 shots (90.24%). To date, for *Tan2013* dataset  
288 this has been the highest accuracy (see Tables 4 and 5). Therefore, our best models can be considered  
289 state of the art.

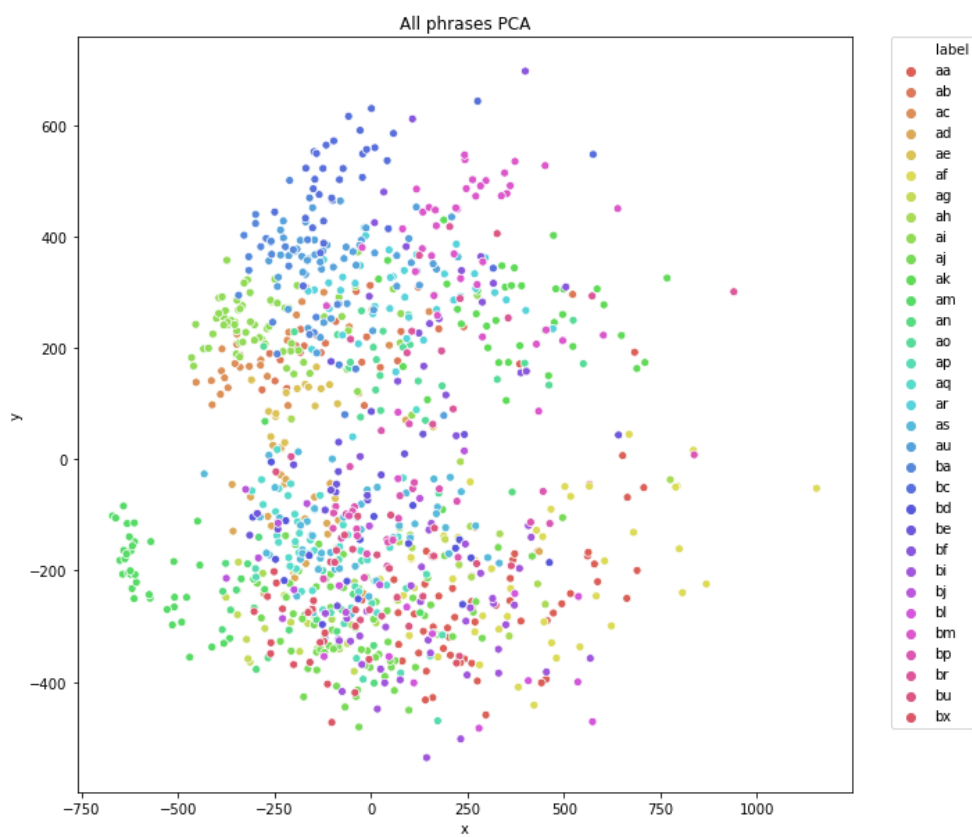

Figure 2: Phrases projected using the first two principal components

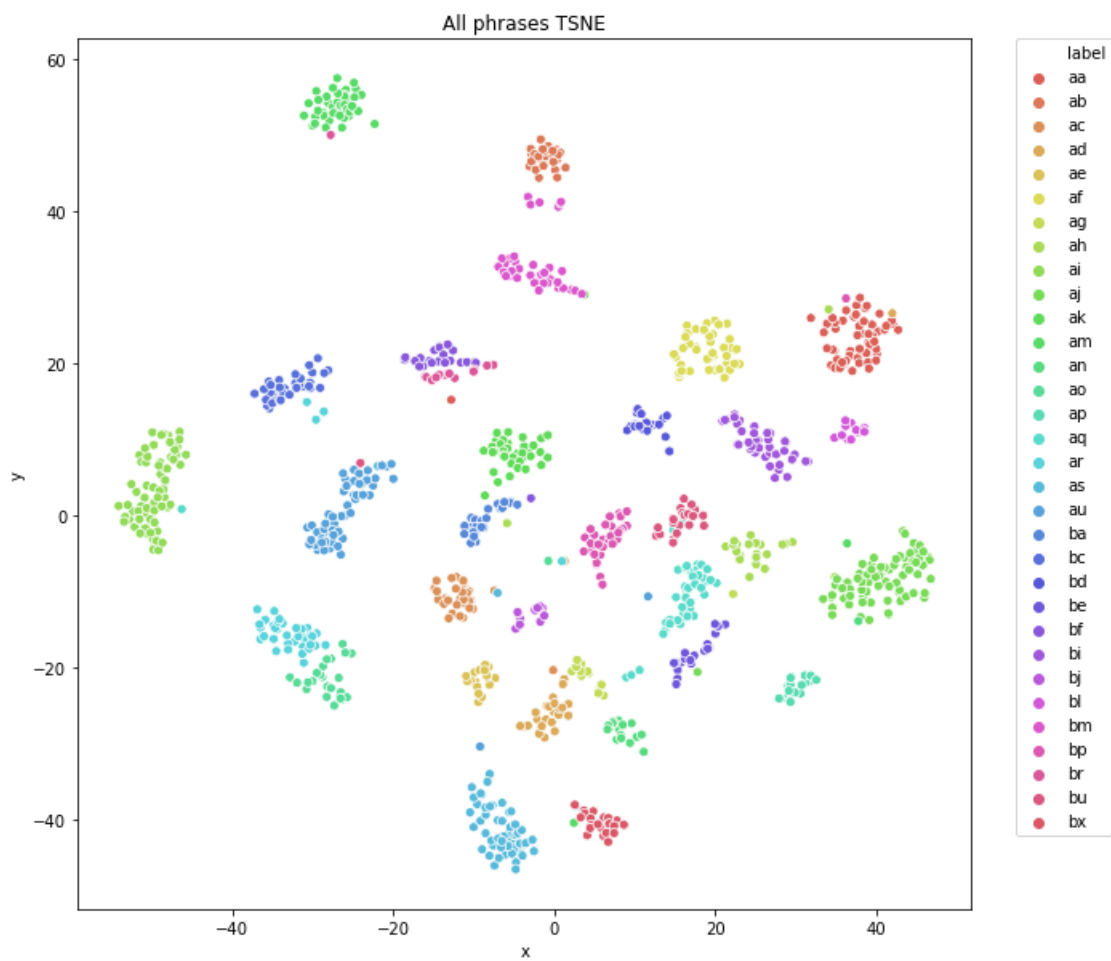

Figure 3: Phrases projected using t-SNE

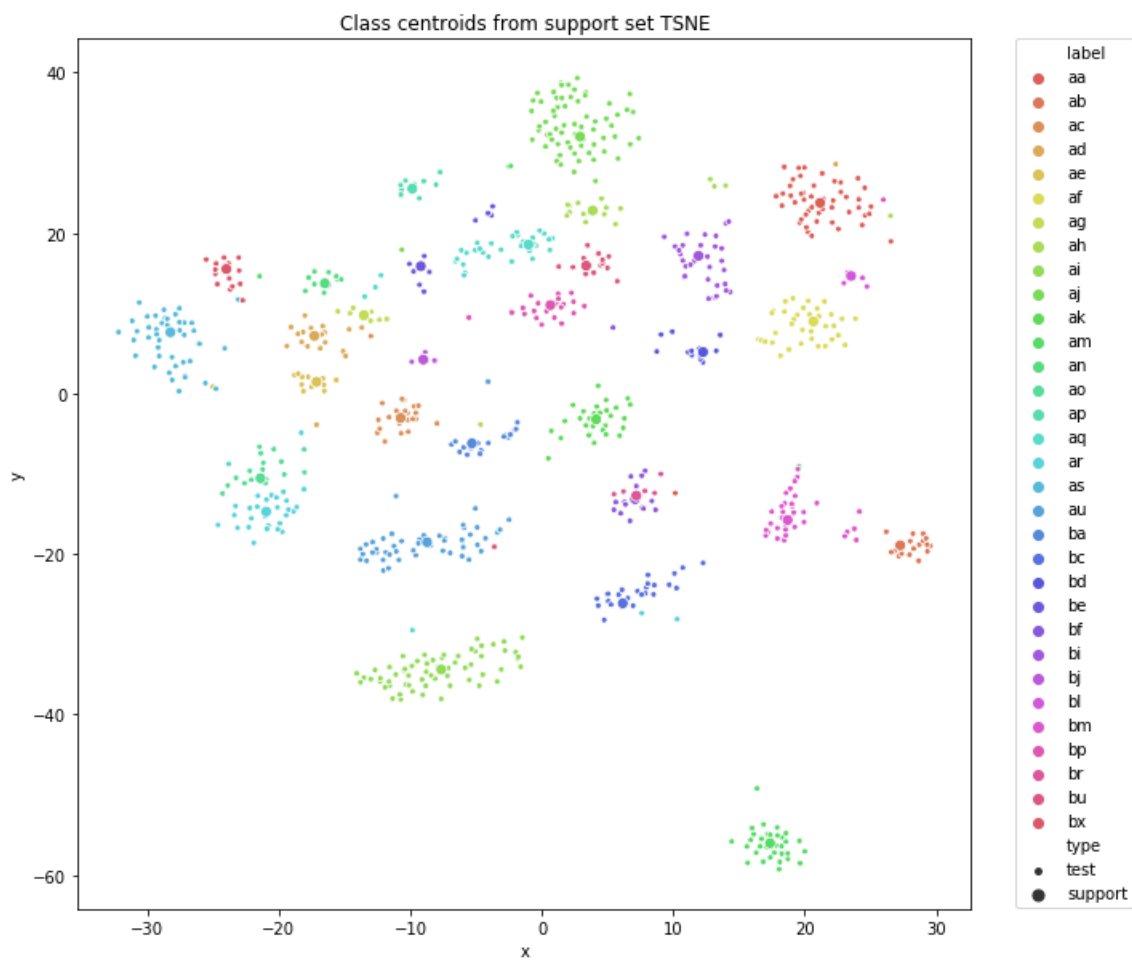

Figure 4: Test set and class centroids computed from support set

290 Despite Tan et al. (2013) performance results are slightly below ( $\sim 2\%$ ) those of our best models, we  
291 consider the difference statistically and practically insignificant. Unfortunately, proper statistical hypoth-  
292 esis testing between our models and those of Tan et al. paper could not be carried out because confidence  
293 intervals were not reported, only average performance.

294 Furthermore, the variance of accuracy as a function of the number of shots ( $k$ ) is reduced both in the  
295 bidirectional LSTM and Zero siamese network, as compared to the rest of models. This can be explained  
296 in terms of the sample complexity of few-shot learning models. In other words, the number of training  
297 samples that we need to provide (so that the learned function is within a small error range most of the  
298 time) is a function of model complexity (i.e. VC dimension) (Vapnik, 2000; Ma & Fu, 2012). Thus,  
299 relatively simple models such as fully connected networks have high bias and variance issues given they  
300 ignore the sequential aspects of birdsong phrases.

301 Figure 4 provides support to the *manifold hypothesis*, which states that sample complexity of the task  
302 depends only on the *intrinsic* dimension, but not the *ambient* dimension of the data manifold (Fefferman,  
303 Mitter, & Narayanan, 2016; Ma & Fu, 2012). In other words, phrase classes cluster in sub-spaces of lower  
304 dimension within the 8192-dimensional (ambient) feature space. Which means the first two principal  
305 components of the full data set may not be able to tell apart 32 phrase classes, but a larger set ( $\ll 8192$ )  
306 could do. This may explain why the visualization in Figure 2 shows poor grouping. Maaten and Hinton  
307 argue that linear dimensionality reduction techniques such as Principal Component Analysis and classical  
308 multidimensional scaling focus on keeping the low-dimensional representations of dissimilar data points  
309 far apart. Thus, for high-dimensional data that lies on or near a low-dimensional non-linear manifold it  
310 is usually more important to keep the low-dimensional representations of very similar data points close  
311 together. (Van Der Maaten & Hinton, 2008).

312 In contrast, t-SNE was particularly useful at revealing cluster structure because it relied on minimizing  
313 Kullback-Leibler divergence between distributions at high and low dimension. This is unsurprising if we  
314 consider Tan et al. (2013) obtained a similar classification performance using only 128 features, which  
315 means the intrinsic dimension is low compared to that of the ambient space. Nevertheless, since t-SNE  
316 makes use of the *manifold hypothesis* by preserving local neighborhoods, in data sets with a high intrinsic  
317 dimensionality and an underlying manifold that is highly varying, the local linearity assumption on the  
318 manifold that t-SNE implicitly makes (by employing Euclidean distances between close neighbors) may be  
319 violated.

320 We believe the fact Zero siamese neural network, a model without non-linear transformations, per-  
321 formed as good as the bidirectional siamese network is best explained by the *Manifold hypothesis* in the  
322 following way: Zero network computed euclidean distances between the average of the support set per class  
323 (centroid) and each query. Then, it assigned the label of the closest centroid. Since differential features of  
324 each class were embedded in low-dimensional sub-manifolds, as shown by Figure 4 and confirmed by Tan et  
325 al. (2013) results, to classify correctly it sufficed to take the closest centroid in a non-linearly transformed  
326 8192-dimensional feature (ambient) space.

327 By the other side, even if the Zero network is almost as good as the bidirectional LSTM, the bi-LSTM  
328 has a slight advantage of  $\sim 2\%$  which may be greater for datasets with a different manifold structure  
329 and more classes. Moreover, since we did not carry out hyperparameter optimization for each few-shot  
330 model, it is premature to generalize any performance gain beyond *Tan2013* dataset. This is to say that our  
331 conclusions are limited to the region of the parameter space we explored, and we cannot say our models  
332 are better overall.

333 Finally, it is important to mention that as opposed to Tan et al. (2013), in this work we were not  
334 concerned with the effect of dimensionality reduction in linear classifiers, but only with the impact of  $k$

335 (shots) across different end-to-end siamese neural network few-shot classifiers. Overall, our results show  
336 varying degrees of sensitivity to  $k$  as a function of neural architectures and confirm few-shot linear models  
337 can obtain similar performance to siamese neural networks provided classes are nicely embedded in low-  
338 dimensional sub-spaces (as shown by t-SNE projection).

| k | Classifier | $d = 32$    | $d = 50$    | $d = 128$   |
|---|------------|-------------|-------------|-------------|
| 3 | SR         | <b>81.8</b> | <b>83.6</b> | N.A.        |
|   | SVM        | 73.5        | 74.8        | 72.4        |
|   | NS         | 79.8        | 79.6        | 82.3        |
| 5 | SR         | <b>83.9</b> | <b>87.0</b> | <b>88.6</b> |
|   | SVM        | 75.3        | 76.8        | 77.3        |
|   | NS         | 82.0        | 84.7        | 84.7        |
| 7 | SR         | <b>85.5</b> | <b>88.2</b> | <b>89.6</b> |
|   | SVM        | 78.7        | 80.8        | 81.6        |
|   | NS         | 84.5        | 86.4        | 86.4        |

Table 6: Tan et al. (2013) Average accuracy table (%) for different values of  $k$  (shots) and  $d$  (number of features). The highest value for each case is boldfaced.

## 339 6 Main findings

340 We carried out a study on the capabilities of few-shot siamese neural network models for bird phrase  
341 verification and classification. From a biological perspective, our results shed light on the manifold structure  
342 and morphological distribution of *Vireo cassinii*. It known that auditory stimuli of syllables of the same  
343 class produce similar activation patterns in auditory brain areas (Koumura & Okanoya, 2016). Which  
344 means phrases that are close according to the metric learned by siamese networks, might share neural  
345 activation patterns during sensorimotor control.

346 Variations in the acoustic properties of birdsong are related to sound production mechanisms and  
347 features of the habitat (Derryberry, 2009). Thus, monitoring these changes across time and space can  
348 uncover causal factors of birdsong evolution and habitat selection. For instance, phrases that are close  
349 in the feature space may share a biological function or physical constraints. Further studies have to be  
350 carried out in this direction to confirm phonological similarities are meaningful at the biological level.

351 More broadly, this work provides a methodology for training machine learning models in class imbalance  
352 and data sparsity conditions. These are common and challenging problems in biological data (Xu &  
353 Jackson, 2019). Since they can dramatically skew the performance of classifiers by introducing a prediction  
354 bias for the majority class, addressing them is of paramount importance, specially in situations where the  
355 occurrence of false negatives is costlier than false positives (Levy, Khoshgoftaar, Bauder, & Seliya, 2018)  
356 (Johnson & Khoshgoftaar, 2019). In our particular situation, LSTM siamese neural networks achieved  
357 state of the art performance, but we also found that computationally cheaper, and not deep-learning  
358 based models such as the *Zero Network* (which is essentially a  $k$ -Nearest Neighbors classifier) can achieve  
359 similar results. Nevertheless, since we did not carry out a thorough evaluation of the hyperparameter space  
360 of siamese models, it is premature to generalize any performance gain beyond *Tan2013* dataset.

361 By the other side, the unexpected result of *Zero network* performing as good as bi-LSTM siamese neural

362 network raised questions about the adequacy of deep learning models. The fact that deep neural networks  
363 have been effective at more domains than simple linear classifiers does not imply complex models are always  
364 better. We think it is important to understand how deep learning models process data manifolds before  
365 drawing any conclusions in this respect. There is ongoing research leveraging methods from statistical  
366 mechanics to tackle foundational questions in this area, particularly generalization and the effects of  
367 random initialization (Bahri et al., 2020).

368 Furthermore, deep learning models are cognitively cheap to implement, as they are capable of learning  
369 representations without direct human input, but their computational cost is high. These computational  
370 factors, as well as those inherent to the nature of data and its distribution should be considered during  
371 the development phase of machine learning models in computational science.

372 Avenues not explored in this work but worth pursuing include: evaluating models beyond *Tan2013*  
373 dataset to see if learned features are universally useful across *Passeriformes* species, measuring the effect of  
374 transfer learning in classification performance, extending the model to perform segmentation and alignment  
375 of new phrases as well as classification and evaluating the stability and performance of few-shot learning  
376 models with different class groupings. Since there is little agreement as to how birdsong elements should  
377 be defined, this might be relevant from both a computational and bioacoustics point of view.

## 378 7 Acknowledgements

379 We would like to thank Dr. Caleb Rascón, Dr. Iván Meza and Dr. Emmanuel Martínez for reviewing this  
380 work, which was fully funded by Tecnológico de Monterrey and Consejo Nacional de Ciencia y Tecnología  
381 (CONACyT) as part of Programa Nacional de Posgrados de Calidad (PNPC) under Award Number  
382 717358.

## 383 References

- 384 Arriaga, J. G., Cody, M. L., Vallejo, E. E., & Taylor, C. E. (2015). Bird-db: A database  
385 for annotated bird song sequences. *Ecological Informatics*, *27*, 21 - 25. Retrieved  
386 from <http://www.sciencedirect.com/science/article/pii/S1574954115000151> doi:  
387 <https://doi.org/10.1016/j.ecoinf.2015.01.007>
- 388 Arriaga, J. G., Kossan, G., Cody, M. L., Vallejo, E. E., & Taylor, C. E. (2013). Acoustic sensor  
389 arrays for understanding bird communication. identifying cassin's vireos using svms and  
390 hmms. In *ECAL* (pp. 827–828). MIT Press.
- 391 Bahri, Y., Kadmon, J., Pennington, J., Schoenholz, S. S., Sohl-Dickstein, J., & Ganguli, S. (2020).  
392 Statistical Mechanics of Deep Learning. *Annual Review of Condensed Matter Physics*. doi:  
393 [10.1146/annurev-conmatphys-031119-050745](https://doi.org/10.1146/annurev-conmatphys-031119-050745)
- 394 Bioacoustics Research Program, & Program, B. R. (2014). *Raven Pro:*  
395 *Interactive Sound Analysis Software (Version 1.5)*. Retrieved from  
396 <http://ravensoundsoftware.com/software/raven-pro/>
- 397 Boersma, P., & Weenink, D. (2011). Praat: Doing phonetics by computer. *Ear and Hearing*. doi:  
398 [10.1097/AUD.0b013e31821473f7](https://doi.org/10.1097/AUD.0b013e31821473f7)



- 399 Catchpole, C. K., & Slater, P. J. B. (2008). *Bird song: Biological themes and variations* (Second  
400 ed.). Cambridge University Press.
- 401 Clark, C., Marler, P., & Beeman, K. (1987). Quantitative Analysis of Animal Vocal Phonology: an  
402 Application to Swamp Sparrow Song. *Ethology*. doi: 10.1111/j.1439-0310.1987.tb00676.x
- 403 Derryberry, E. P. (2009). Ecology shapes birdsong evolution: Variation in morphology and  
404 habitat explains variation in white-crowned sparrow song. *American Naturalist*. doi:  
405 10.1086/599298
- 406 Fefferman, C., Mitter, S., & Narayanan, H. (2016, 10). Testing the manifold hypothesis. *Journal*  
407 *of the American Mathematical Society*, 29(4), 983–1049. doi: 10.1090/jams/852
- 408 Fukuzawa, Y., Marsland, S., Pawley, M., & Gilman, A. (2017). Segmentation of harmonic sylla-  
409 bles in noisy recordings of bird vocalisations. In *International conference image and vision*  
410 *computing new zealand*. doi: 10.1109/IVCNZ.2016.7804445
- 411 Furbee, L. (1992). Categorization and Naming in Children: Problems in Induction.:Categorization  
412 and Naming in Children: Problems in Induction. *Journal of Linguistic Anthropology*. doi:  
413 10.1525/jlin.1992.2.1.120
- 414 Goguen, C. B., & Curson, D. R. (2002). Cassin’s vireo (vireo cassinii). *The Birds of North America*  
415 *Online*. Retrieved from <https://doi.org/10.2173/bna.615> doi: 10.2173/bna.615
- 416 Goodfellow, I., et al. (2016). *Deep learning*. MIT Press.
- 417 Johnson, J. M., & Khoshgoftaar, T. M. (2019). Survey on deep learning with class imbalance.  
418 *Journal of Big Data*. doi: 10.1186/s40537-019-0192-5
- 419 Kaewtip, K., Taylor, C., & Alwan, A. (2016). Noise-robust hidden markov models for lim-  
420 ited training data for within-species bird phrase classification. In *Interspeech 2016* (pp.  
421 2587–2591). Retrieved from <http://dx.doi.org/10.21437/Interspeech.2016-1360> doi:  
422 10.21437/Interspeech.2016-1360
- 423 Kershenbaum, A. (2014). Entropy rate as a measure of animal vocal complexity. *Bioacoustics*.  
424 doi: 10.1080/09524622.2013.850040
- 425 Kershenbaum, A., et al. (2016). Acoustic sequences in non-human animals: A tutorial review and  
426 prospectus. *Biological Reviews*, 91(1), 13–52. doi: 10.1111/brv.12160
- 427 Koops, H. V., van Balen, J., & Wiering, F. (2015). Automatic Segmentation and Deep Learning of  
428 Bird Sounds. In J. Mothe et al. (Eds.), *Experimental ir meets multilinguality, multimodality,*  
429 *and interaction* (pp. 261–267). Cham: Springer International Publishing.
- 430 Koumura, T., & Okanoya, K. (2016). Automatic recognition of element classes and boundaries in  
431 the birdsong with variable sequences. *PLoS ONE*, 11(7). doi: 10.1371/journal.pone.0159188
- 432 Leevy, J. L., Khoshgoftaar, T. M., Bauder, R. A., & Seliya, N. (2018). A survey on addressing  
433 high-class imbalance in big data. *Journal of Big Data*. doi: 10.1186/s40537-018-0151-6
- 434 Ma, Y., & Fu, Y. (2012). *Manifold learning theory and applications*. CRC Press.
- 435 Pearre, B., Perkins, L. N., Markowitz, J. E., & Gardner, T. J. (2017). A fast and accurate zebra  
436 finch syllable detector. *PLoS ONE*. doi: 10.1371/journal.pone.0181992
- 437 Planqué, B., & Vellinga, W.-P. (2005). *Xenocanto*. Retrieved from <http://xeno-canto.org>
- 438 Potamitis, I., Ntalampiras, S., Jahn, O., & Riede, K. (2014). Automatic bird sound de-  
439 tection in long real-field recordings: Applications and tools. *Applied Acoustics*. doi:  
440 10.1016/j.apacoust.2014.01.001
- 441 Ranjard, L., & Ross, H. A. (2008). Unsupervised bird song syllable classification using evolving  
442 neural networks. *The Journal of the Acoustical Society of America*. doi: 10.1121/1.2903861
- 443 Tan, L. N., Alwan, A., Kossan, G., Cody, M. L., & Taylor, C. E. (2015). Dynamic time warp-  
444 ing and sparse representation classification for birdsong phrase classification using limited

- 445 training data. *The Journal of the Acoustical Society of America*, 137(3), 1069–1080. doi:  
446 10.1121/1.4906168
- 447 Tan, L. N., Kaewtip, K., Cody, M. L., Taylor, C. E., & Alwan, A. (2012). Evaluation of a  
448 sparse representation-based classifier for bird phrase classification under limited data condi-  
449 tions. In *13th annual conference of the international speech communication association 2012, interspeech 2012*.  
450
- 451 Tan, L. N., Kossan, G., Cody, M. L., Taylor, C. E., & Alwan, A. (2013). A sparse representation-  
452 based classifier for in-set bird phrase verification and classification with limited training  
453 data. In *Icassp, iee international conference on acoustics, speech and signal processing -*  
454 *proceedings*. doi: 10.1109/ICASSP.2013.6637751
- 455 Van Der Maaten, L., & Hinton, G. (2008). Visualizing data using t-SNE. *Journal of Machine*  
456 *Learning Research*.
- 457 Vapnik, V. N. (2000). *The Nature of Statistical Learning Theory*. Springer. doi: 10.1007/978-1-  
458 4757-3264-1
- 459 Xu, C., & Jackson, S. A. (2019). *Machine learning and complex biological data*. doi:  
460 10.1186/s13059-019-1689-0
- 461 Yip, K., & Sussman, G. J. (1997). Sparse representations for fast, one-shot learning. In *Proceedings*  
462 *of the national conference on artificial intelligence* (pp. 521–527). AAAI.

463 **8 Appendix**

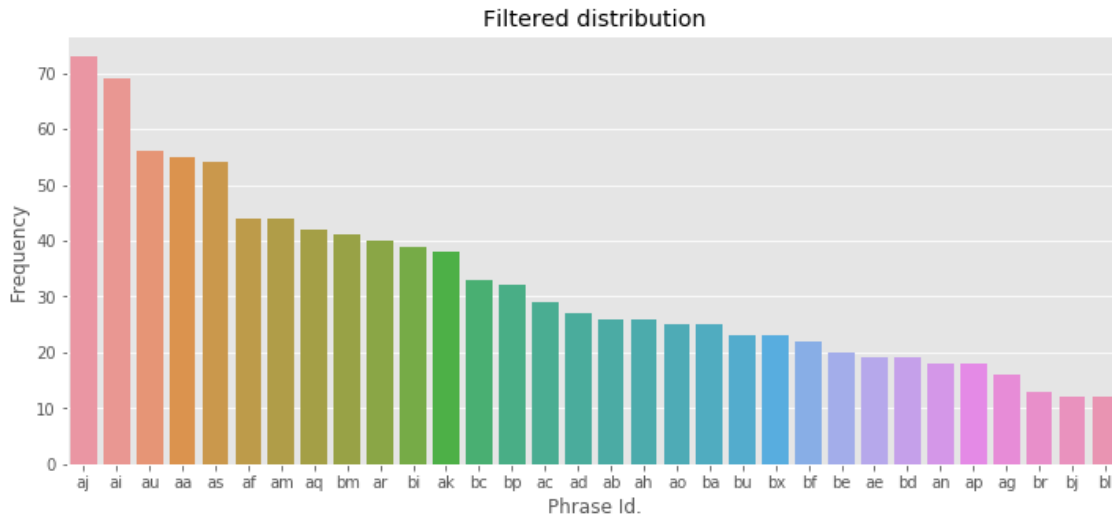

Figure 5: CAVI phrases with at least 12 instances

| Encoder        | # Parameters | Trainable Layers |
|----------------|--------------|------------------|
| <i>Zero</i>    | 0            | 0                |
| <i>CNN</i>     | 68,672       | 4                |
| <i>LSTM</i>    | 444,288      | 6                |
| <i>Bi-LSTM</i> | 855,424      | 6                |
| <i>FCN</i>     | 1,131,264    | 6                |

Table 7: Siamese networks summary

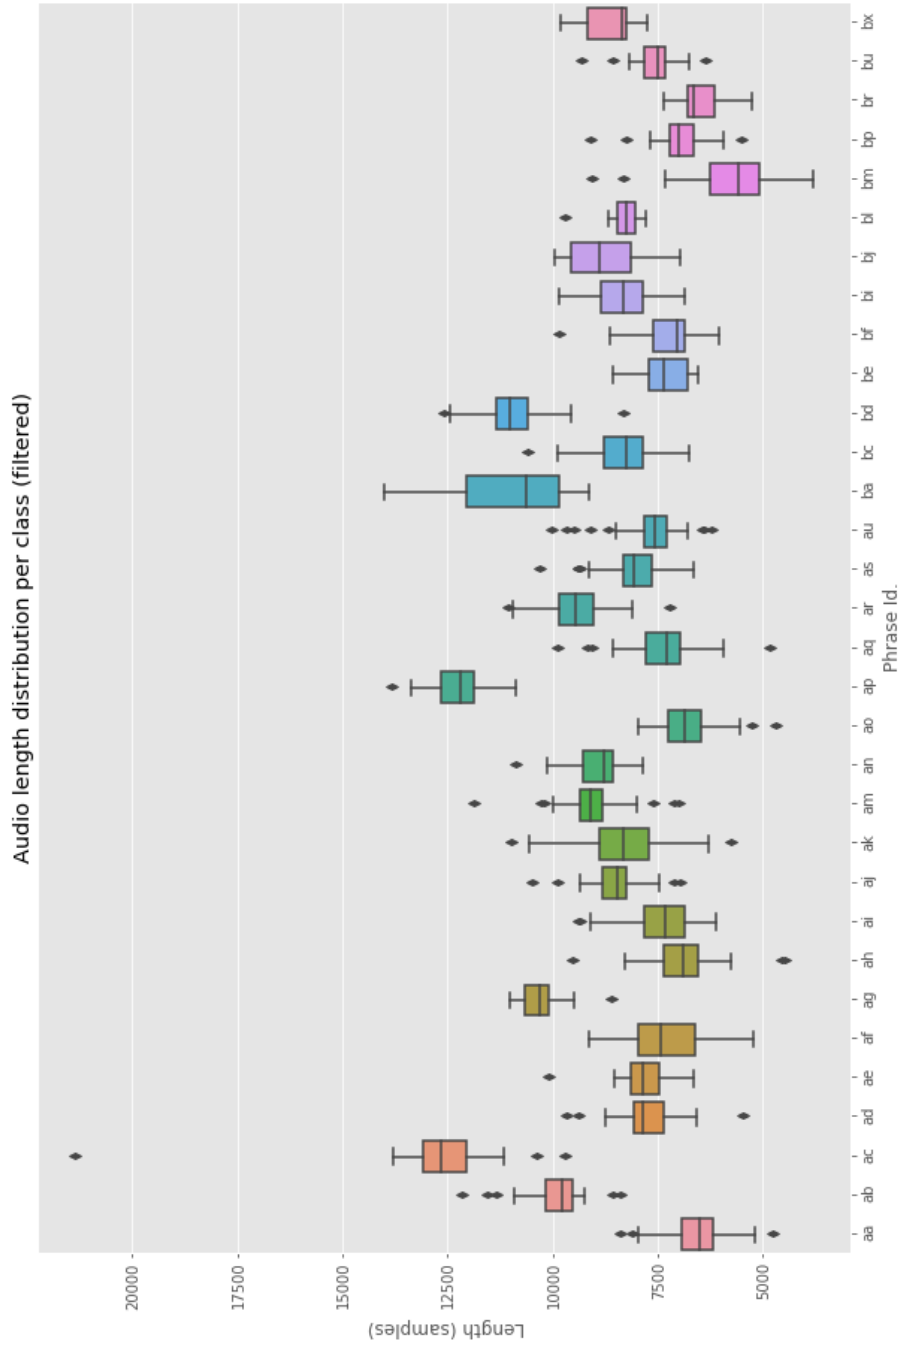

Figure 6: Length of CAVI phrases with at least 12 instances

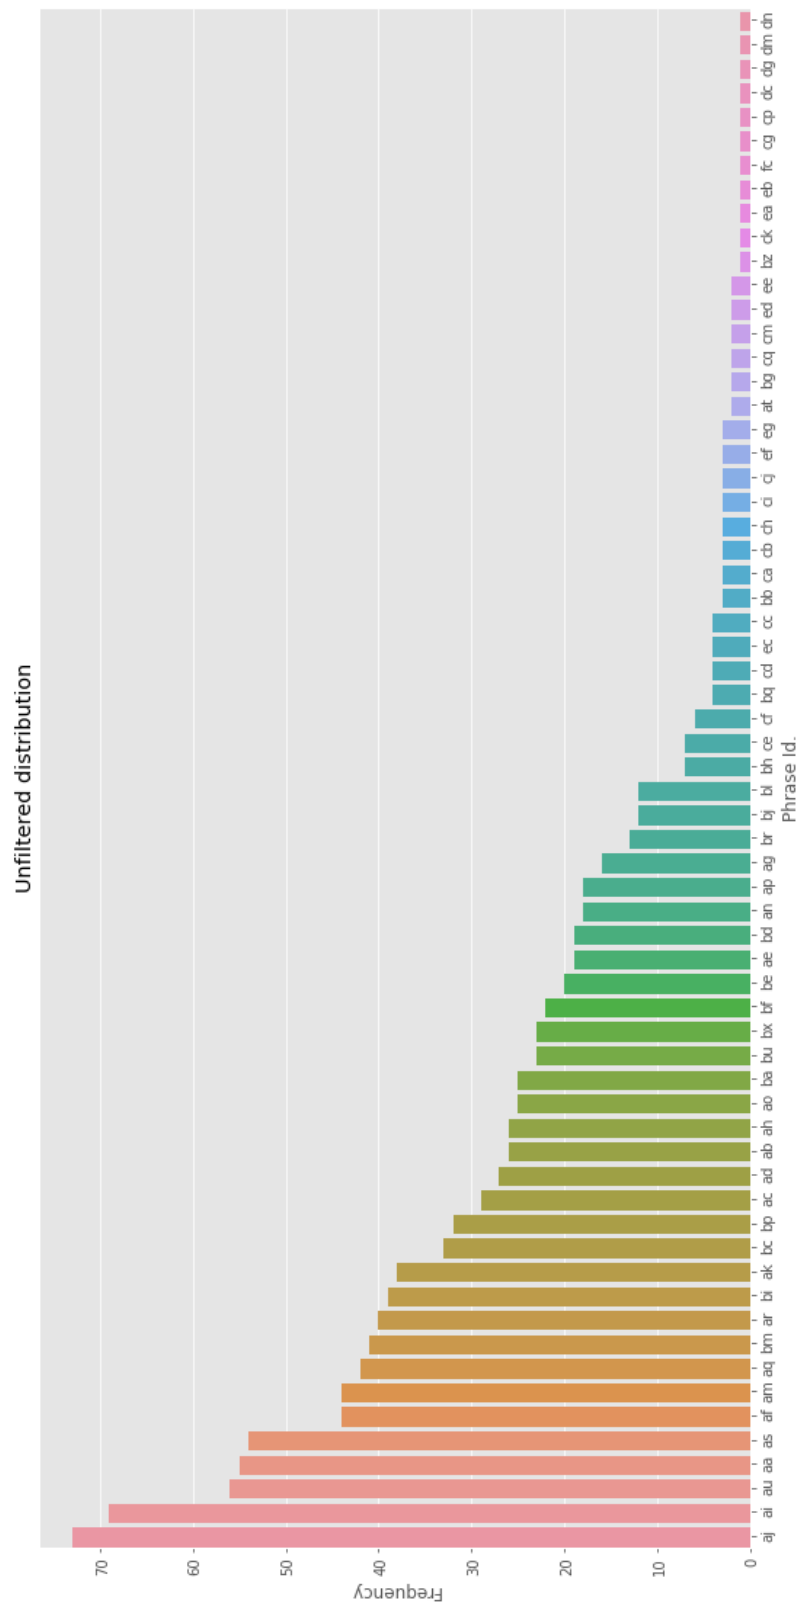

Figure 7: 64 CAVI phrases found in *Tan2013* data set

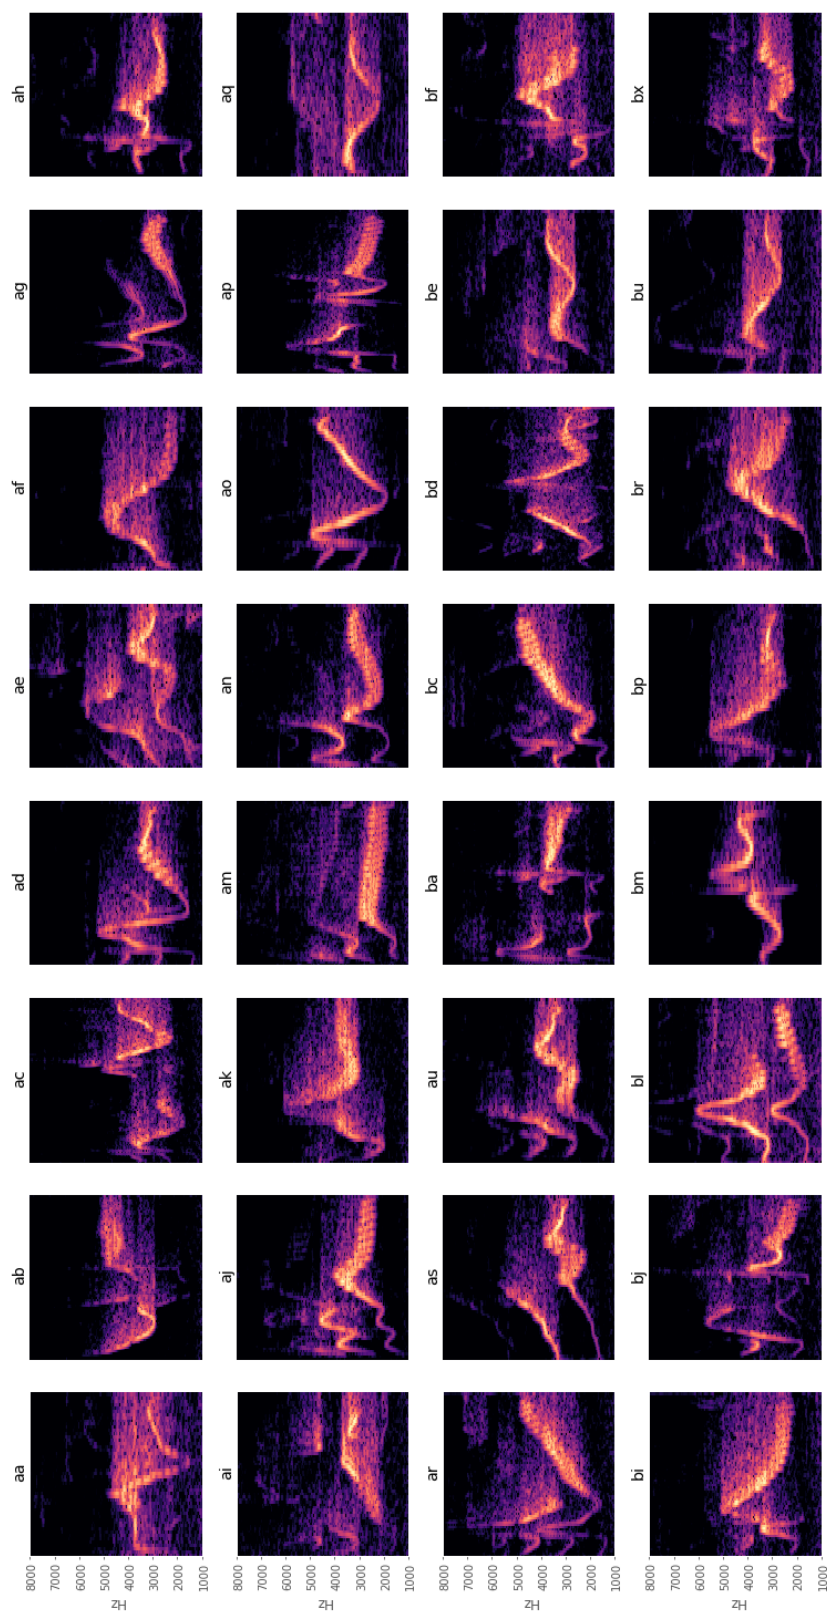

Figure 8: Spectrograms of CAVI phrase classes with at least 12 tokens
